# Supplementary material
Source: Springer Nature journal article supplement (https://www.springermedizin.de/resource/supplementary/13256_2012_2479_MOESM2_ESM.pdf/9650294)

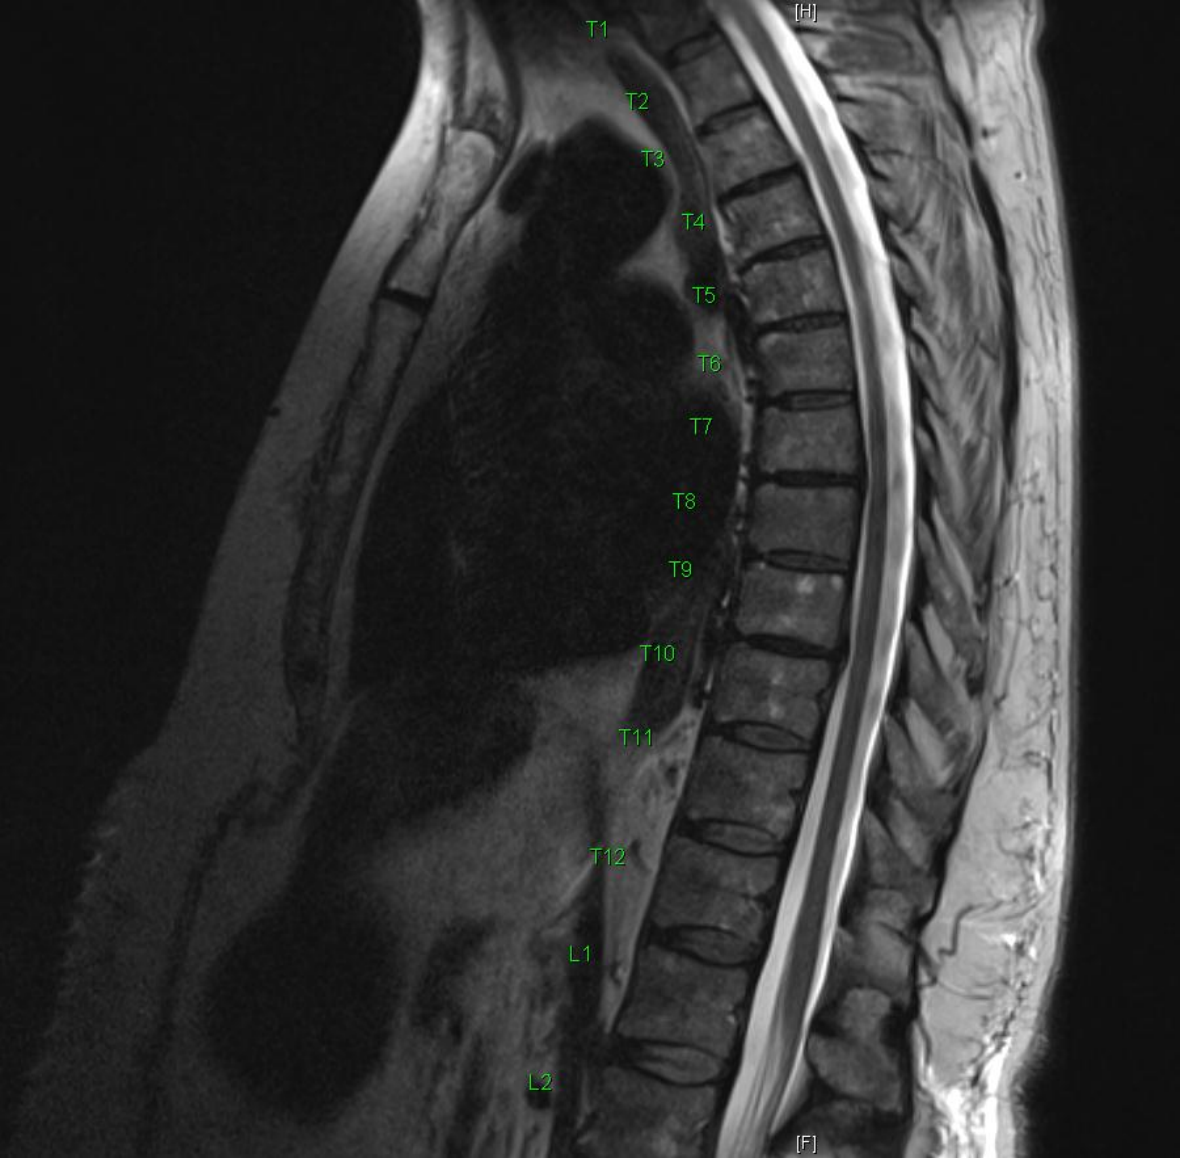

T1

[H]

T2

T3

T4

T5

T6

T7

T8

T9

T10

T11

T12

L1

L2

[F]

Supplement: MOESM2 [file 9650294]
